# Supplementary material for: A New Series of Indeno[1,2-c]pyrazoles as EGFR TK Inhibitors for NSCLC Therapy
Source: MDPI journal article supplement (doi:10.3390/molecules27020485), 2022-01-13
Supplement: s1 [file s1]

# Supplementary Material

## A New Series of Indeno[1,2-*c*]pyrazoles as EGFR TK Inhibitors for NSCLC Therapy

Ahmet Özdemir <sup>1,\*</sup>, Halilibrahim Ciftci <sup>2,3,4</sup>, Belgin Sever <sup>1,3</sup>, Hiroshi Tateishi <sup>3</sup>, Masami Otsuka <sup>2,3</sup>, Mikako Fujita <sup>3,\*</sup> and Mehlika Dilek Altıntop <sup>1,\*</sup>

<sup>1</sup> Department of Pharmaceutical Chemistry, Faculty of Pharmacy, Anadolu University, Eskisehir 26470, Turkey; belginsever@anadolu.edu.tr

<sup>2</sup> Department of Drug Discovery, Science Farm Ltd., Kumamoto 862-0976, Japan; hiciftci@kumamoto-u.ac.jp (H.C.); motsuka@gpo.kumamoto-u.ac.jp (M.O.)

<sup>3</sup> Medicinal and Biological Chemistry Science Farm Joint Research Laboratory, Faculty of Life Sciences, Kumamoto University, Kumamoto 862-0973, Japan; htateishi@kumamoto-u.ac.jp

<sup>4</sup> Department of Molecular Biology and Genetics, Koc University, Istanbul 34450, Turkey

\* Correspondence: ahmeto@anadolu.edu.tr (A.Ö.); mfujita@kumamoto-u.ac.jp (M.F.); mdaltintop@anadolu.edu.tr (M.D.A.); Tel.: +90-222-335-0580 (ext. 3780) (A.Ö.); +81-96-371-4622 (M.F.); +90-222-335-0580 (ext. 3807) (M.D.A.)

**Figure S1.** The IR spectrum of compound **4**

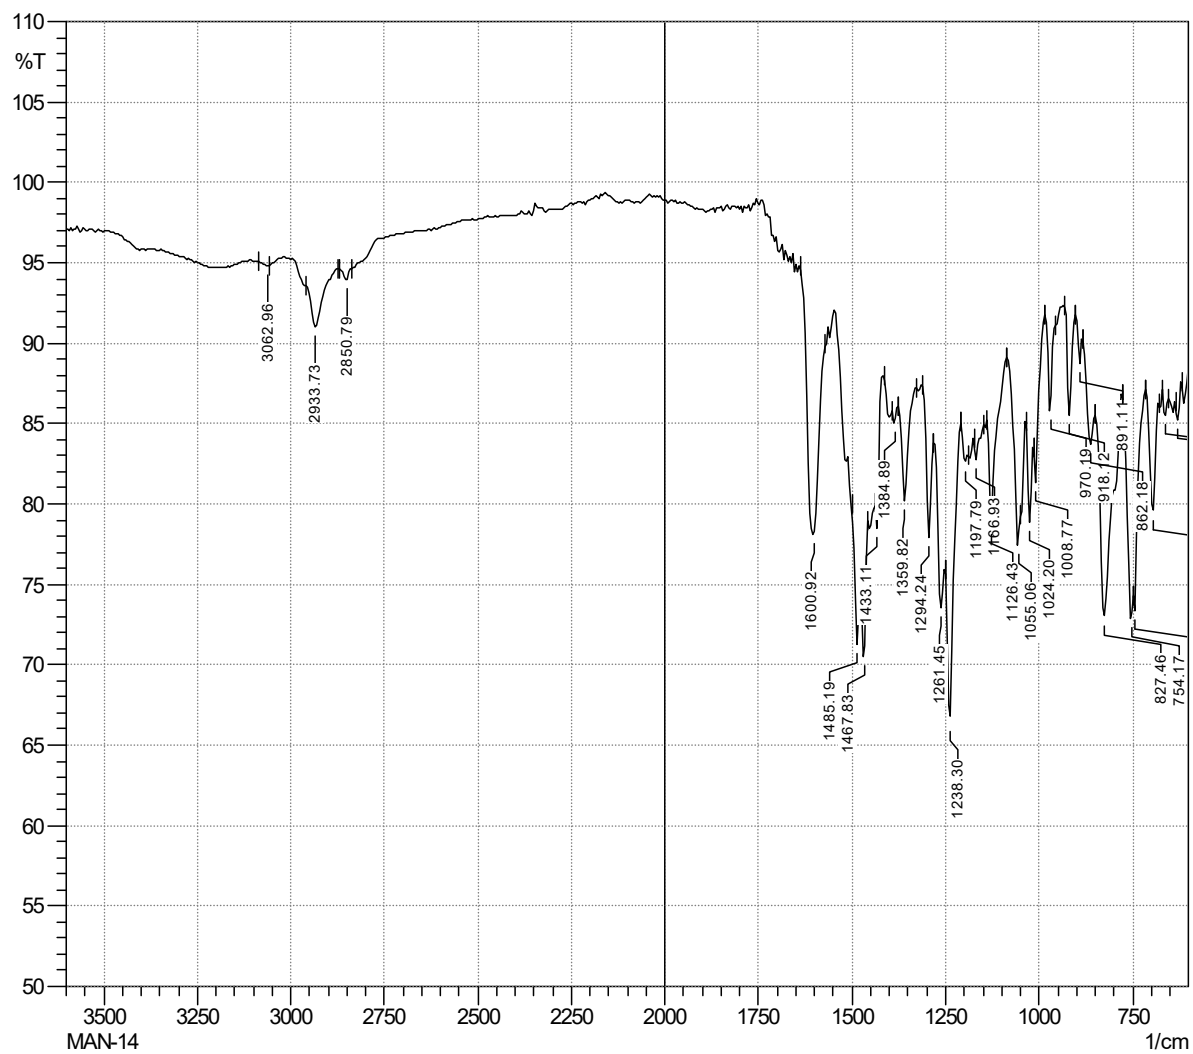

**Figure S2.** The  $^1\text{H}$  NMR spectrum of compound 4

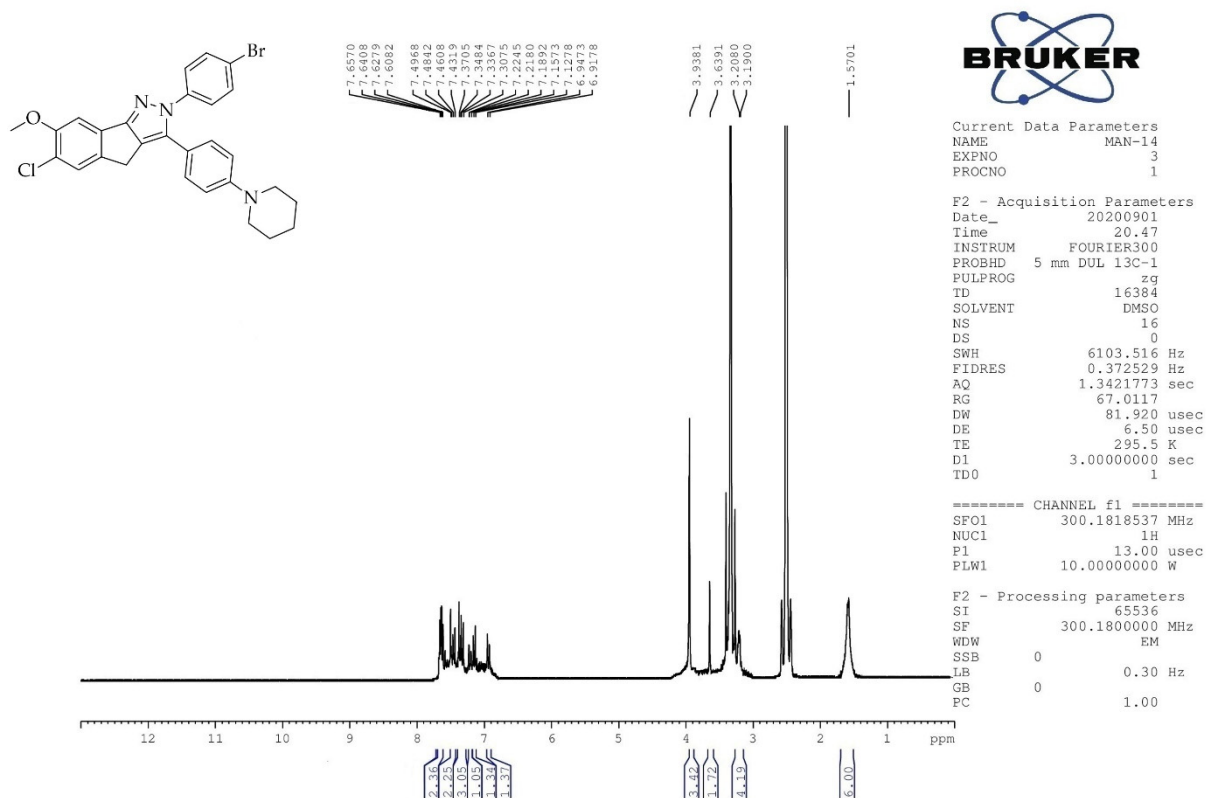

**Figure S3.** The  $^{13}\text{C}$  NMR spectrum of compound 4

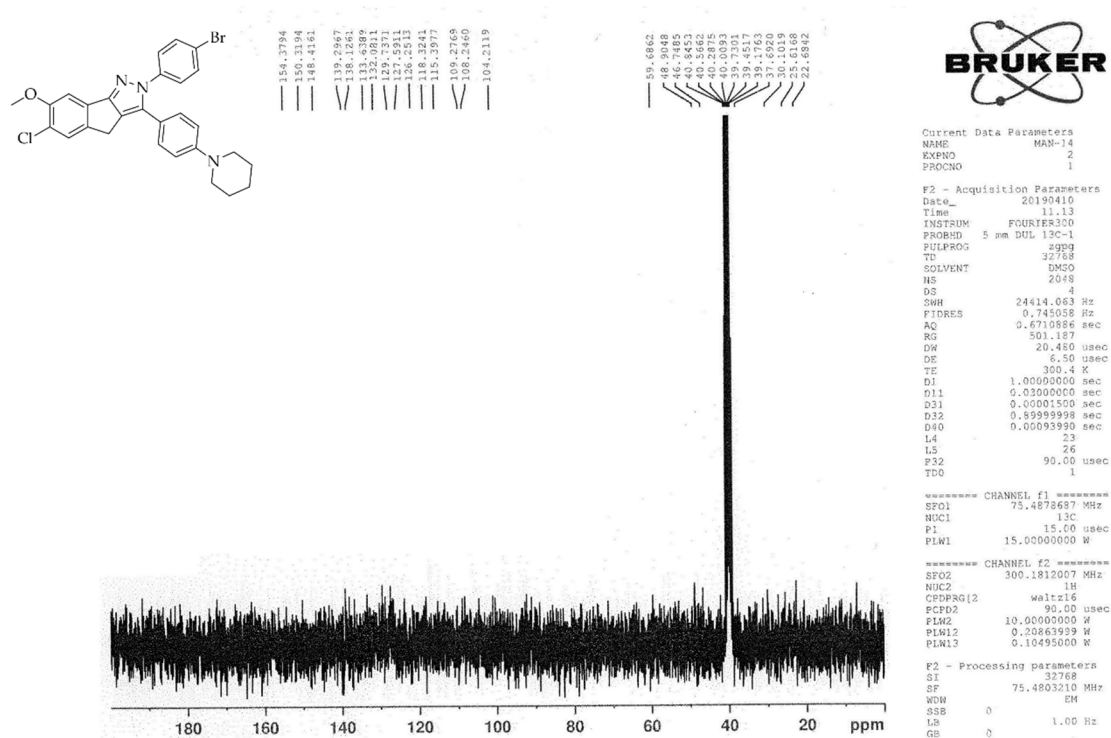

**Figure S4.** The HRMS spectrum of compound **4**

Formula Predictor Report - MAN-14\_8.lcd

Page 1 of 1

Data File: C:\LabSolutions\Data\Analiz\AOzdemin\MAN-14\_8.lcd

| Elmt | Val. | Min | Max | Use Adduct |
|------|------|-----|-----|------|------|-----|-----|------|------|-----|-----|------|------|-----|-----|------------|
| H    | 1    | 9   | 35  | O    | 2    | 0   | 5   | S    | 2    | 0   | 0   | Ru   | 2    | 0   | 0   | H          |
| C    | 4    | 26  | 35  | F    | 1    | 0   | 0   | Cl   | 1    | 1   | 4   | Pd   | 2    | 0   | 0   |            |
| N    | 3    | 3   | 5   | P    | 3    | 0   | 0   | Br   | 1    | 1   | 1   | I    | 3    | 0   | 0   |            |

Error Margin (ppm): 5

DBE Range: 5.0 - 20.0

Electron Ions: both

HC Ratio: unlimited

Apply N Rule: yes

Use MSn Info: yes

Max Isotopes: 3

Isotope RI (%): 1.00

Isotope Res: 9000

MSn Iso RI (%): 10.00

MSn Logic Mode: AND

Max Results: 100

Event#: 1 MS(E+) Ret. Time : 7.093 -> 7.280 Scan#: 1065 -> 1093

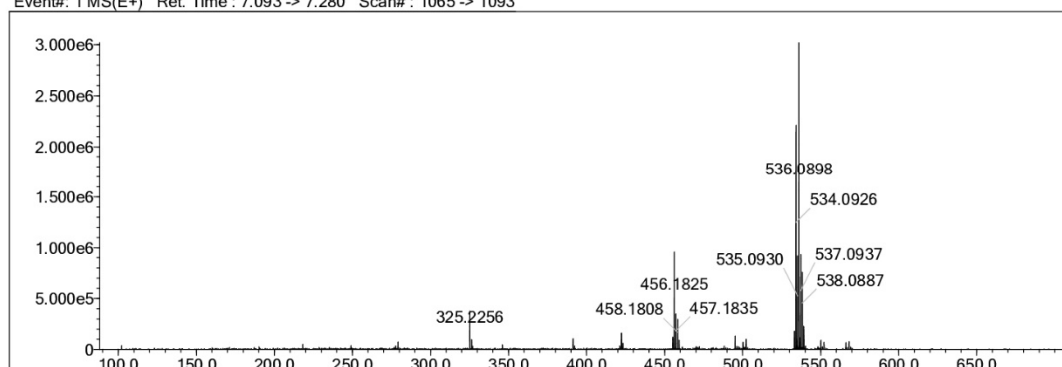

Measured region for 534.0926 m/z

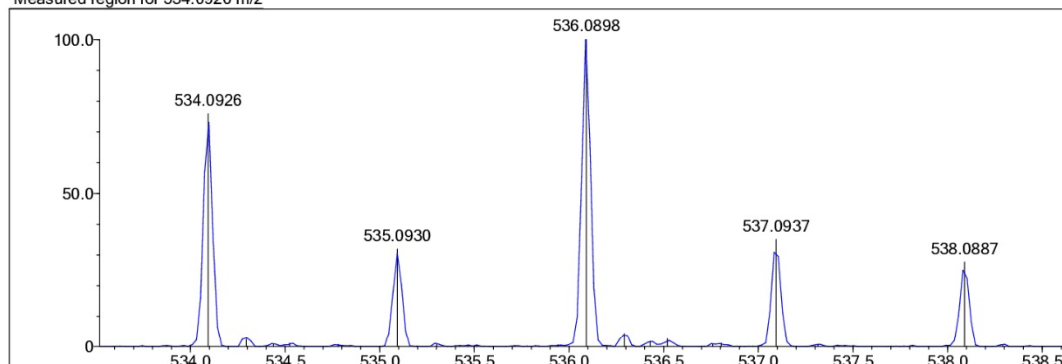

C28 H25 N3 O Cl Br [M+H]<sup>+</sup> : Predicted region for 534.0942 m/z

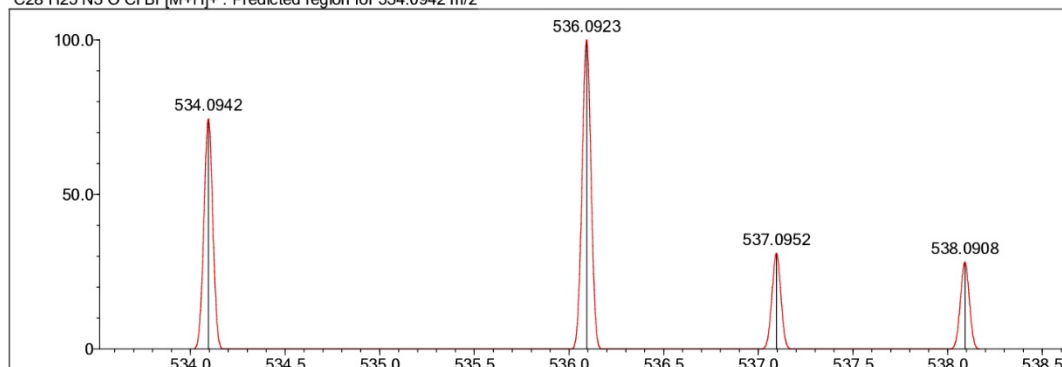

| Rank | Score | Formula (M)        | Ion                | Meas. m/z | Pred. m/z | Df. (mDa) | Df. (ppm) | Iso   | DBE  |
|------|-------|--------------------|--------------------|-----------|-----------|-----------|-----------|-------|------|
| 1    | 72.79 | C28 H25 N3 O Cl Br | [M+H] <sup>+</sup> | 534.0926  | 534.0942  | -1.6      | -3.00     | 76.62 | 17.0 |
